3. Bergeson SC, Dean JC. A systems approach to patient-centered care. *JAMA* 2006; **296**:2848–2851.
4. Illingworth R. What does 'patient-centred' mean in relation to the consultation? *Clin Teach* 2010;**7**:116–120.
5. Blendon RJ, Schoen C, DesRoches C, Osborn R, Zapert K. Common concerns among diverse systems: health care experiences in 5 countries. *Health Aff* 2003; **22**:106–121.
6. Mead N, Bower P. Patient-centredness: a conceptual framework and review of the empirical literature. *Soc Sci Med* 2000;**51**:1087–1110.
7. Van Weel C. Person-centred medicine in the context of primary care: a view from the World Organization of Family Doctors (WONCA). *J Eval Clin Pract* 2011;**17**:337–338.
8. Dickstein K, Cohen-Solal A, Filippatos G, McMurray JJ, Ponikowski P, Poole-Wilson PA, Stromberg A, van Veldhuisen DJ, Atar D, Hoes AW, Keren AMebazaa A, Nieminen M, Priori SG, Swedberg K. ESC Guidelines for the diagnosis and treatment of chronic heart failure 2008. *Eur Heart J* 2008;**29**: 2388–2442.
9. Lorig KR, Sobel DS, Stewart AL, Brown BW Jr, Bandura A, Ritter P, Gonzalez VM, Laurent DD, Holman HR. Evidence suggesting that a chronic disease self-management program can improve health status while reducing hospitalization: a randomized trial. *Med Care* 1999;**37**:5–14.
10. Department of Health. *The Expert Patient: A New Approach to Chronic Disease Management for the 21st Century*. London: Department of Health, 2001.
11. Sackett DL, Strauss SE, Scott-Richardson W, Rosenberg W, Haynes RB. *Evidence-based Medicine: How to Practice and Teach EBM*, 2nd edn. Edinburgh: Churchill Livingstone, 2000.
12. Lewin S, Skea Z, Entwistle VA, Zwarenstein M, Dick J. *Interventions for Providers to Promote a Patient-centred Approach in Clinical Consultations (Review)*. The Cochrane Collaboration. London: John Wiley & Sons, Ltd, 2009.
13. Ekman I, Wolf A, Olsson L-E, Taft C, Dudas K, Schaufelberger M, Swedberg K. Effects of person-centred care in patients with chronic heart failure: the PCC-HF study. *Eur Heart J* 2012;**33**:1112–1119.
14. Zaphiriou A, Mulligan K, Hargrave P, Patterson D, Cowie MR, Newman S, Hardman S. Improved outcomes following hospitalisation in patients with a new diagnosis of heart failure. *Heart* 2006;**92**(Suppl II):A119.
15. Olsson LE, Karlsson J, Ekman I. The integrated care pathway reduced the number of hospital days by half: a prospective comparative study of patients with acute hip fracture. *J Orthop Surg Res* 2006;**1**:3.

## CARDIOVASCULAR FLASHLIGHT

doi:10.1093/eurheartj/ehs028

Online publish-ahead-of-print 16 February 2012

### Lines of Zahn in coronary artery thrombus

Regent Lee<sup>1</sup>, David Adlam<sup>1</sup>, Colin A. Clelland<sup>2</sup>, and Keith M. Channon<sup>1\*</sup>

<sup>1</sup>Department of Cardiovascular Medicine, University of Oxford, John Radcliffe Hospital, Headington, Oxford, UK and <sup>2</sup>Department of Cellular Pathology, Oxford Radcliffe Hospital, Oxford, UK

\*Corresponding author. Tel: +44 1865 572783, Email: keith.channon@cardiov.ox.ac.uk

A 46-year-old female presented with troponin-positive acute coronary syndrome and lateral ischaemic changes on electrocardiograph. Coronary angiography revealed a critical stenosis distal to the bifurcation of the intermediate coronary artery, with a crescentic lesion tethered to its distal end suggestive of a thrombus (Panel A, white inset, white arrow). Aspiration of the thrombus was performed using an Export<sup>®</sup> catheter (Medtronic) and a sickle-shaped thrombus was retrieved (Panel A, yellow inset). Angioplasty of the stenotic segment was performed with insertion of a drug-eluting stent (Boston Taxus<sup>®</sup>, 2.75/12 mm).

Macroscopically, the thrombus consisted of alternating white and red bands typical of Lines of Zahn (Panel B). This feature was also demonstrated on histology examination of the specimen (Panel C). Lines of Zahn are characteristic of thrombus formed at the site of rapid arterial blood flow, with laminations produced by successive deposition of platelets and fibrin (pale layers) alternating with red blood cells (dark layers). This thrombus was likely to be associated with high-velocity blood flow produced by the upstream stenotic lesion.

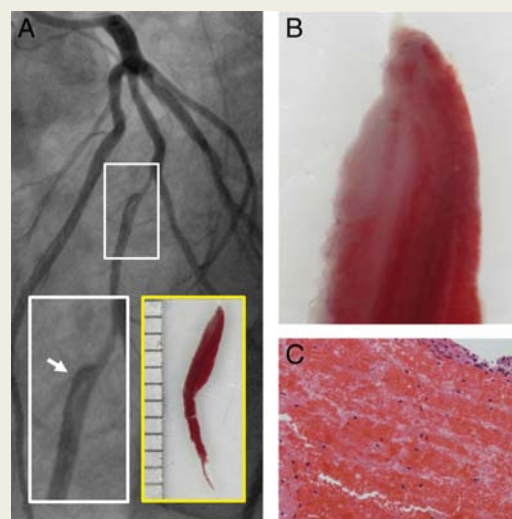

#### Funding

This work is supported by the NIHR Oxford Biomedical Research Centre.

Published on behalf of the European Society of Cardiology. All rights reserved. © The Author 2012. For permissions please email: journals.permissions@oup.com
